# Supplementary material
Source: HighWire-hosted journal article supplement (https://www.cmajopen.ca/highwire/filestream/85473/field_highwire_adjunct_files/2/2020-0188-3-at.pdf)
Supplement: 2020-0188-3-at.pdf [file 2020-0188-3-at.pdf]

Annual cost estimates for 10-year and Lifetime Models; values listed at age 45 (mean age at first cycle of Markov model)

| Estimate                                               | Publicly<br>Funded<br>Health Care<br>System<br>Costs (CDN) | Plausible<br>Range | Societal<br>Perspective<br>Value<br>Assigned<br>(CDN) | Plausible<br>Range | Distribution |
|--------------------------------------------------------|------------------------------------------------------------|--------------------|-------------------------------------------------------|--------------------|--------------|
| Standard care<br>group no<br>comorbidity               | 3240                                                       | 160-6490           | 6590                                                  | 120-20600          | Gamma        |
| Standard care<br>group diabetes                        | 6020                                                       | 770-43770          | 25000                                                 | 600-190930         | Gamma        |
| Standard care<br>group<br>hypertension                 | 4130                                                       | 670-8260           | 8500                                                  | 1140-14940         | Gamma        |
| Standard care<br>group<br>Diabetes and<br>hypertension | 9510                                                       | 50-182260          | 38690                                                 | 200-245020         | Gamma        |
| Standard care<br>group death                           | 13390                                                      | 22920-<br>37790    | 31370                                                 | 31370-54760        | Gamma        |

|                                                    |       |                 |       |             |       |
|----------------------------------------------------|-------|-----------------|-------|-------------|-------|
| Medical<br>Therapy no<br>comorbidity               | 7880  | 90-15630        | 8940  | 200-51130   | Gamma |
| Medical<br>Therapy<br>diabetes                     | 7650  | 650-10210       | 10130 | 740-67100   | Gamma |
| Medical<br>Therapy<br>hypertension                 | 9500  | 1010-30270      | 9830  | 1300-43490  | Gamma |
| Medical<br>Therapy<br>Diabetes and<br>hypertension | 9510  | 350-37920       | 12540 | 350-65370   | Gamma |
| Medical<br>Therapy death                           | 27300 | 22920-<br>37790 | 45600 | 40300-54760 | Gamma |
| Surgical<br>Therapy no<br>comorbidity              | 7800  | 270-54720       | 12980 | 380-98950   | Gamma |
| Surgical<br>Therapy<br>diabetes                    | 7000  | 1450-48000      | 13700 | 890-55540   | Gamma |

|                                                     |       |                 |       |             |       |
|-----------------------------------------------------|-------|-----------------|-------|-------------|-------|
| Surgical<br>Therapy<br>hypertension                 | 6490  | 350-25000       | 10980 | 1030-59780  | Gamma |
| Surgical<br>Therapy<br>Diabetes and<br>hypertension | 7560  | 740-16140       | 10590 | 900-27780   | Gamma |
| Surgical<br>Therapy death                           | 27300 | 22920-<br>37790 | 45600 | 40300-54760 | Gamma |
